# Supplementary material for: An effective strategy for enhancing energy storage density in (Pb1−1.5xGdx)(Zr0.87Sn0.12Ti0.01)O3 antiferroelectric ceramics
Source: Royal Society of Chemistry journal article supplement (doi:10.1039/d3ta03491g), 2023-01-01
Supplement: d3ta03491g1.pdf [file d3ta03491g1.pdf]

### Supplementary file

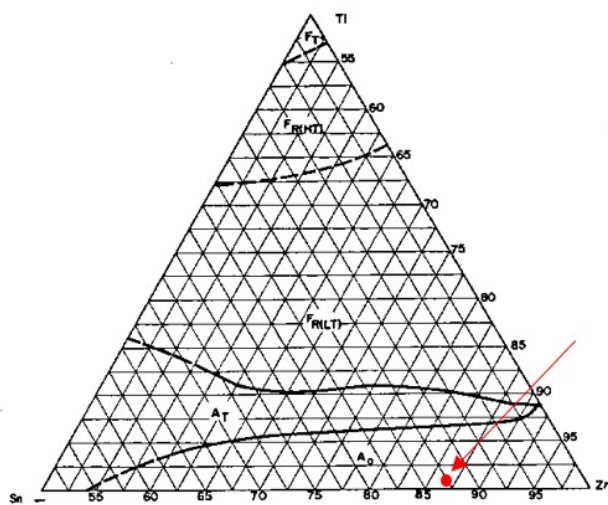

**Fig. S1** Phase diagram for the system  $\text{Pb}_{0.97}\text{La}_{0.02}(\text{Zr}, \text{Sn}, \text{Ti})\text{O}_3$  at  $25\text{ }^\circ\text{C}$ ,<sup>1</sup> along with the position of the composition for  $\text{Pb}(\text{Zr}_{0.87}\text{Sn}_{0.12}\text{Ti}_{0.01})\text{O}_3$ .

Fig. S1 is provided to explain why the component  $\text{Pb}(\text{Zr}_{0.87}\text{Sn}_{0.12}\text{Ti}_{0.01})\text{O}_3$  was selected.

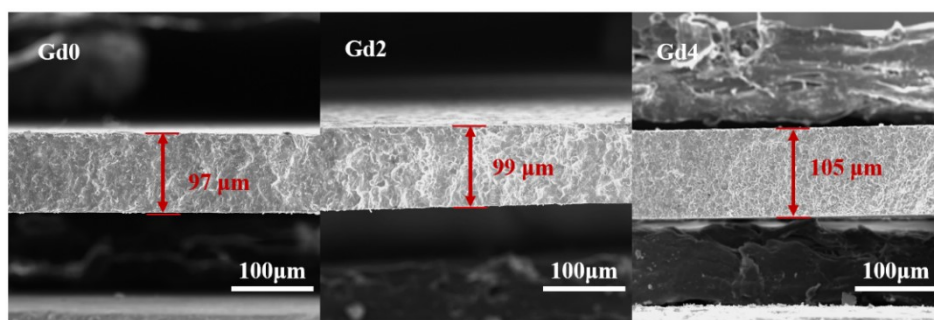

**Fig. S2** SEM images of samples' cross section

Fig. S2 graphically confirms the thicknesses of the samples, which are consistent with the measurements of the samples by a thousandth thickness gauge.

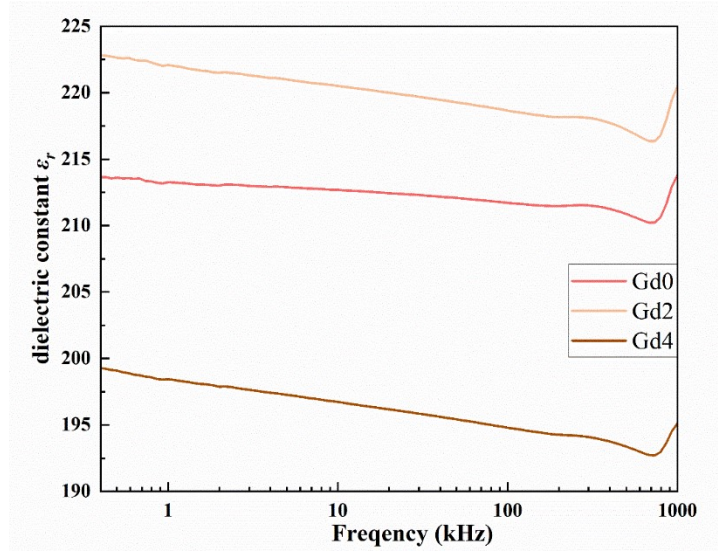

**Fig. S3** Frequency-dependent dielectric constant of Gd0, Gd2, Gd4.

Fig. S3 is measured in order to calculate the distribution of electric field.

**The references of Fig. 4(d):**

PbZrO<sub>3</sub>(PZ)<sup>2-17</sup>, PbHfO<sub>3</sub>(PH)<sup>18-21</sup>; AgNbO<sub>3</sub> (AN)<sup>22-29</sup>, BaTiO<sub>3</sub> (BT)<sup>30-33</sup>, BiFeO<sub>3</sub> (BF)<sup>34-37</sup>, Na<sub>0.5</sub>Bi<sub>0.5</sub>TiO<sub>3</sub> (NBT)<sup>38-48</sup>, NaNbO<sub>3</sub> (NN)<sup>49-53</sup>.

**The references of Fig. 8(d):**

PLZST@300 kV/cm<sup>54</sup>, PLZST@240 kV/cm, PLZST@80 kV/cm<sup>55</sup>, PBLZST@130 kV/cm<sup>56</sup>, PH@300 kV/cm<sup>19</sup>, AN+Ta@410 kV/cm<sup>29</sup>, ANT+Mn@800 kV/cm<sup>57</sup>, AN+Ta+Ca@200 kV/cm<sup>27</sup>, AN+La@320 kV/cm<sup>58</sup>.

**The references of Fig. 9(d):**

PLZST@100 kV/cm<sup>59</sup>, PBLZST@120 kV/cm<sup>60</sup>, BF-BT-BLN@400 kV/cm<sup>61</sup>, BSB@300 kV/cm<sup>62</sup>, NBT-CZT@200 kV/cm<sup>63</sup>, BNST-BNTSNA@300 kV/cm<sup>64</sup>, BNBLT-0.25SBT@200 kV/cm<sup>65</sup>, NN+Bi@200 kV/cm<sup>66</sup>, BZZ@270kV/cm<sup>67</sup>, BNKTBZ-0.04AN@90 kV/cm<sup>68</sup>, BNKT-KNN@80 kV/cm<sup>69</sup>, BF-BT-0.14AN@100kV/cm<sup>70</sup>.

**The references of Fig. 10(c):**

PZ<sup>71-73</sup>, PH<sup>21, 74, 75</sup>, BT<sup>32, 76, 77</sup>, AN<sup>78-80</sup>, BF<sup>34, 37, 81</sup>, NBT<sup>42, 82, 83</sup>, NN<sup>49, 50, 53</sup>.

**The references of Fig. 10(f):**

PZ<sup>84-88</sup>, PH<sup>18, 21, 75</sup>, BT<sup>32, 76, 89</sup>, AN<sup>27, 29, 79</sup>, BF<sup>34, 37, 81</sup>, NBT<sup>47, 62, 82, 83</sup>, NN<sup>49, 50, 53</sup>.

**References:**

1. D. Berlincourt, *IEEE Trans. Sonics Ultrason*, 1966, **13**, 116-124.
2. H. Wang, Y. Liu, T. Yang and S. Zhang, *Adv. Funct. Mater.*, 2019, **29**, 1807321.
3. X. Liu, Y. Li and X. Hao, *J. Mater. Chem. A*, 2019, **7**, 11858-11866.
4. Z. Li, Z. Fu, H. Cai, T. Hu, Z. Yu, Y. Luo, L. Zhang, H. Yao, X. Chen and S. Zhang, *Sci adv*, 2022, **8**, eabl9088.
5. P. Liu, B. Fan, G. Yang, W. Li, H. Zhang and S. Jiang, *J. Mater. Chem. C*, 2019, **7**, 4587-4594.
6. Y. Liu, T. Yang and H. Wang, *J. Mater. Sci-Mater in EL*, 2019, **31**, 1509-1514.

7. G. Zhang, D. Zhu, X. Zhang, L. Zhang, J. Yi, B. Xie, Y. Zeng, Q. Li, Q. Wang, S. Jiang and S. Zhang, *J. Am. Ceram. Soc.*, 2015, **98**, 1175-1181.
8. S. Chen, T. Yang, J. Wang and X. Yao, *J Mater Sci-Mater EL*, 2013, **24**, 4764-4768.
9. Q. Zhang, Y. Dan, J. Chen, Y. Lu, T. Yang, X. Yao and Y. He, *Ceram. Int.*, 2017, **43**, 11428-11432.
10. P. Mohapatra, Z. Fan, J. Cui and X. Tan, *J. Eur. Ceram. Soc.*, 2019, **39**, 4735-4742.
11. J. Wang, T. Yang, S. Chen and X. Yao, *Funct Mater Lett*, 2014, **07**, 1350064.
12. Q. Liao, Y. Bao, S. Yan, X. Chen, Y. Lin, X. Dong and G. Wang, *J. Eur. Ceram. Soc.*, 2022, **42**, 3877-3885.
13. S. Liu, Y. Liu and T. Yang, *J. Alloys Compd.*, 2021, **861**, 158559.
14. Y. Liu, S. Liu, T. Yang and H. Wang, *J. Mater Sci*, 2021, **56**, 6073-6082.
15. C. Li, M. Yao, W. Gao and X. Yao, *Ceram. Int.*, 2020, **46**, 722-730.
16. J. Xie, M. Yao, W. Gao, Z. Su and X. Yao, *J. Eur. Ceram. Soc.*, 2019, **39**, 1050-1056.
17. J. Wang, T. Yang, S. Chen and G. Li, *Mater. Res. Bull.*, 2013, **48**, 3847-3849.
18. J. Wei, T. Yang and H. Wang, *J. Eur. Ceram. Soc.*, 2019, **39**, 624-630.
19. W. Chao, T. Yang and Y. Li, *J. Mater. Chem. C*, 2020, **8**, 17016-17024.
20. J. Guo and T. Yang, *J. Alloys Compd.*, 2021, **888**, 161539.
21. P.-Z. Ge, X.-G. Tang, K. Meng, X.-X. Huang, S.-F. Li, Q.-X. Liu and Y.-P. Jiang, *Chem. Eng. J.*, 2022, **429**, 132540.
22. L. Zhao, Q. Liu, S. Zhang and J.-F. Li, *J. Mater. Chem. C*, 2016, **4**, 8380-8384.
23. L. Zhao, Q. Liu, J. Gao, S. Zhang and J. F. Li, *Adv. Mater.*, 2017, **29**.
24. K. Han, N. Luo, Y. Jing, X. Wang, B. Peng, L. Liu, C. Hu, H. Zhou, Y. Wei, X. Chen and Q. Feng, *Ceram. Int.*, 2019, **45**, 5559-5565.
25. K. Han, N. Luo, S. Mao, F. Zhuo, X. Chen, L. Liu, C. Hu, H. Zhou, X. Wang and Y. Wei, *J. Materiomics*, 2019, **5**, 597-605.
26. N. Luo, K. Han, F. Zhuo, C. Xu, G. Zhang, L. Liu, X. Chen, C. Hu, H. Zhou and Y. Wei, *J. Mater. Chem. A*, 2019, **7**, 14118-14128.
27. W. Chao, T. Yang, Y. Li and Z. Liu, *J. Am. Ceram. Soc.*, 2020, **103**, 7283-7290.
28. N. Luo, K. Han, M. J. Cabral, X. Liao, S. Zhang, C. Liao, G. Zhang, X. Chen, Q. Feng, J. F. Li and Y. Wei, *Nat Commun*, 2020, **11**, 4824.
29. W. Chao, J. Gao, T. Yang and Y. Li, *J. Eur. Ceram. Soc.*, 2021, **41**, 7670-7677.
30. M. Yao, S. You and Y. Peng, *Ceram. Int.*, 2017, **43**, 3127-3132.
31. F. Yan, H. Bai, X. Zhou, G. Ge, G. Li, B. Shen and J. Zhai, *J. Mater. Chem. A*, 2020, **8**, 11656-11664.
32. W. Huang, Y. Chen, X. Li, G. Wang, J. Xia and X. Dong, *Chem. Eng. J.*, 2022, **444**, 135523.
33. F. Yang, Y. Bao, W. Huang, X. Li, Y. Chen and G. Wang, *J. Mater. Chem. C*, 2022, **10**, 7614-7625.
34. F. Li, J. Zhai, B. Shen, H. Zeng, X. Jian and S. Lu, *J. Alloys Compd.*, 2019, **803**, 185-192.
35. Q. Li, S. Ji, D. Wang, J. Zhu, L. Li, W. Wang, M. Zeng, Z. Hou, X. Gao, X. Lu, Q. Li and J.-M. Liu, *J. Eur. Ceram. Soc.*, 2021, **41**, 387-393.
36. A. Khesro, F. A. Khan, R. Muhammad, A. Ali, M. Khan and D. Wang, *Ceram. Int.*, 2022, **48**, 29938-29943.
37. H. Tang, Y.-C. Hu, X.-Y. Chen, X.-D. Jian, X.-B. Zhao, Y.-B. Yao, T. Tao, B. Liang, X.-G. Tang and S.-G. Lu, *Ceram. Int.*, 2022, **48**, 16792-16799.
38. W. P. Cao, W. L. Li, X. F. Dai, T. D. Zhang, J. Sheng, Y. F. Hou and W. D. Fei, *J. Eur. Ceram. Soc.*, 2016, **36**, 593-600.
39. T. Li, X. Jiang, J. Li, A. Xie, J. Fu and R. Zuo, *ACS Appl Mater Interfaces*, 2022, **14**, 22263-22269.
40. T. Li, P. Chen, F. Li and C. Wang, *Chem. Eng. J.*, 2021, **406**, 127151.
41. H. Qi and R. Zuo, *J. Mater. Chem. A*, 2019, **7**, 3971-3978.

42. M. Wang, Q. Feng, C. Luo, Y. Ian, C. Yuan, N. Luo, C. Zhou, T. Fujita, J. Xu, G. Chen and Y. Wei, *ACS Appl Mater Inter*, 2021, **13**, 51218-51229.
43. W. Cao, T. Li, P. Chen and C. Wang, *ACS Appl Energy Mater*, 2021, **4**, 9362-9367.
44. J. Huang, H. Qi, Y. Gao, A. Xie, Y. Zhang, Y. Li, S. Wang and R. Zuo, *Chem. Eng. J.*, 2020, **398**, 125639.
45. Q.-N. Li, C.-R. Zhou, J.-W. Xu, L. Yang, X. Zhang, W.-D. Zeng, C.-L. Yuan, G.-H. Chen and G.-H. Rao, *J. Electron. Mater.*, 2016, **45**, 5146-5151.
46. C. Luo, Q. Feng, N. Luo, C. Yuan, C. Zhou, Y. Wei, T. Fujita, J. Xu and G. Chen, *Chem. Eng. J.*, 2021, **420**, 129861.
47. X. Zhou, H. Qi, Z. Yan, G. Xue, H. Luo and D. Zhang, *ACS Appl Mater Interfaces*, 2019, **11**, 43107-43115.
48. P. Butnoi, S. Manotham, P. Jaita, C. Randorn and G. Rujijanagul, *J. Eur. Ceram. Soc.*, 2018, **38**, 3822-3832.
49. J. Chen, H. Qi and R. Zuo, *ACS Appl Mater Inter*, 2020, **12**, 32871-32879.
50. A. Tian, R. Zuo, H. Qi and M. Shi, *J. Mater. Chem. A*, 2020, **8**, 8352-8359.
51. A. Xie, H. Qi and R. Zuo, *ACS Appl Mater Interfaces*, 2020, **12**, 19467-19475.
52. L. Fulanović, M.-H. Zhang, Y. Fu, J. Koruza and J. Rödel, *J. Eur. Ceram. Soc.*, 2021, **41**, 5519-5525.
53. A. Xie, R. Zuo, Z. Qiao, Z. Fu, T. Hu and L. Fei, *Adv Energy Mater*, 2021, **11**, 2101378.
54. Q. Zhang, H. Tong, J. Chen, Y. Lu, T. Yang, X. Yao and Y. He, *Appl. Phys. Lett.*, 2016, **109**, 262901.
55. Z. Liu, X. Chen, W. Peng, C. Xu, X. Dong, F. Cao and G. Wang, *Appl. Phys. Lett.*, 2015, **106**, 262901.
56. G. Zhang, P. Liu, B. Fan, H. Liu, Y. Zeng, S. Qiu, S. Jiang, Q. Li, Q. Wang and J. Liu, *IEEE T. Dielect El In*, 2017, **24**, 744-748.
57. L.-F. Zhu, L. Zhao, Y. Yan, H. Leng, X. Li, L.-Q. Cheng, X. Xiong and S. Priya, *J. Mater. Chem. A*, 2021, **9**, 9655-9664.
58. S. Li, T. Hu, H. Nie, Z. Fu, C. Xu, F. Xu, G. Wang and X. Dong, *Energy Storage Mater*, 2021, **34**, 417-426.
59. P. Qiao, Y. Zhang, X. Chen, M. Zhou, S. Yan, X. Dong and G. Wang, *Ceram. Int.*, 2019, **45**, 15898-15905.
60. Y. Yang, P. Liu, Y. Zhang, K. R. Kandula, J. Xu, G. Zhang and S. Jiang, *Ceram. Int.*, 2020, **46**, 18106-18113.
61. G. Wang, Z. Lu, H. Yang, H. Ji, A. Mostaed, L. Li, Y. Wei, A. Feteira, S. Sun, D. C. Sinclair, D. Wang and I. M. Reaney, *J. Mater. Chem. A*, 2020, **8**, 11414-11423.
62. L. Zhang, R. Jing, Y. Huang, Q. Hu, D. O. Alikin, V. Y. Shur, J. Gao, X. Wei, L. Zhang, G. Liu, Y. Yan and L. Jin, *J. Materiomics*, 2022, **8**, 527-536.
63. S. Bian, Z. Yue, Y. Shi, J. Zhang and W. Feng, *J. Am. Ceram. Soc.*, 2020, **104**, 936-947.
64. F. Yan, H. Bai, G. Ge, J. Lin, K. Zhu, G. Li, J. Qian, B. Shen, J. Zhai and Z. Liu, *Small*, 2022, **18**, e2202575.
65. H. Ye, F. Yang, Z. Pan, D. Hu, X. Lv, H. Chen, F. Wang, J. Wang, P. Li, J. Chen, J. Liu and J. Zhai, *Acta Mater.*, 2021, **203**, 116484.
66. M. Zhou, R. Liang, Z. Zhou and X. Dong, *J. Mater. Chem. A*, 2018, **6**, 17896-17904.
67. J. Shi, X. Chen, C. Sun, F. Pang, H. Chen, X. Dong, X. Zhou, K. Wang and H. Zhou, *Ceram. Int.*, 2020, **46**, 25731-25737.
68. A. K. Yadav, H. Fan, B. Yan, C. Wang, J. Ma, M. Zhang, W. Wang, W. Dong and S. Wang, *Ceram. Int.*, 2020, **46**, 17044-17052.
69. J. Hao, Z. Xu, R. Chu, W. Li, D. Juan and F. Peng, *Solid State Commun.*, 2015, **204**, 19-22.
70. H. Sun, X. Wang, Q. Sun, X. Zhang, Z. Ma, M. Guo, B. Sun, X. Zhu, Q. Liu and X. Lou, *J. Eur. Ceram. Soc.*, 2020, **40**, 2929-2935.
71. X. Liu, Y. Li, N. Sun and X. Hao, *Inorg Chem Front*, 2020, **7**.
72. J. Yang, G. Ge, J. Lin, C. Shi, B. Shen and J. Zhai, *Chem. Eng. J.*, 2022, **434**, 134660.
73. R. Xu, Q. Zhu, Z. Xu and Y. Feng, *J. Appl. Phys.*, 2021, **130**, 124102.
74. R. Xu, Q. Zhu, Z. Xu, Y. Feng and X. Wei, *Appl. Phys. Lett.*, 2022, **120**, 052904.

75. P.-Z. Ge, X.-G. Tang, Q.-X. Liu, Y.-P. Jiang and X.-B. Guo, *Energy Mater. Adv.*, 2023, **4**.
76. G. Liu, Y. Li, B. Guo, M. Tang, Q. Li, J. Dong, L. Yu, K. Yu, Y. Yan, D. Wang, L. Zhang, H. Zhang, Z. He and L. Jin, *Chem. Eng. J.*, 2020, **398**, 125625.
77. L. Chen, F. Li, B. Gao, C. Zhou, J. Wu, S. Deng, H. Liu, H. Qi and J. Chen, *Chem. Eng. J.*, 2023, **452**, 139222.
78. H. Yuan, X. Fan, Z. Zheng, M. Zhao, L. Zhao, K. Zhu and J. Wang, *Chem. Eng. J.*, 2023, **456**, 141023.
79. P. Shi, X. Wang, X. Lou, C. Zhou, Q. Liu, L. He, S. Yang and X. Zhang, *J. Alloys Compd.*, 2021, **877**, 160162.
80. D. Yang, Y. Lan, C. Yuan, H. Lai, J. Wu, Q. Feng, B. Zhu, L. Meng, C. Zhou, J. Xu, J. Wang and G. Rao, *J. Mater. Sci-Mater EL*, 2022, **33**, 3081-3090.
81. J. Zhao, Z. Pan, L. Tang, Y. Shen, X. Chen, H. Li, P. Li, Y. Zhang, J. Liu and J. Zhai, *Mater. Today Phys.*, 2022, **27**, 100821.
82. L. Zhang, M. Zhao, Y. Yang, Y. Li, M. Tang, D. Wang, X. Wei, G. Liu, Y. Yan and L. Jin, *Chem. Eng. J.*, 2023, DOI: 10.1016/j.cej.2023.142862, 142862.
83. L. Zhang, Y. Pu, M. Chen, T. Wei and X. Peng, *Chem. Eng. J.*, 2020, **383**, 123154.
84. X. Wang, Q. Zhu, H. Sun, M. Wang, R. Xu, Y. Feng, Z. Li, X. Wei and Z. Xu, *J. Eur. Ceram. Soc.*, 2023, **43**, 4051-4059.
85. J. Huang, M. Yao and X. Yao, *ACS Appl Energy Mater.*, 2021, **4**, 5897-5904.
86. K. Huang, G. Ge, H. Bai, F. Yan, X. He, Y. Shi, B. Shen and J. Zhai, *J. Eur. Ceram. Soc.*, 2021, **41**, 2450-2457.
87. K. Huang, G. Ge, F. Yan, B. Shen and J. Zhai, *Adv. Electron. Mater.*, 2020, **6**, 1901366.
88. C. Xu, Z. Liu, X. Chen, S. Yan, F. Cao, X. Dong and G. Wang, *J. Appl. Phys.*, 2016, **120**, 074107.
89. M. Zhou, R. Liang, Z. Zhou and X. Dong, *Ceram. Int.*, 2019, **45**, 3582-3590.
